# Supplementary material for: Genetic and Cross Neutralization Analyses of Coxsackievirus A16 Circulating in Taiwan from 1998 to 2021 Suggest Dominant Genotype B1 can Serve as Vaccine Candidate
Source: MDPI journal article supplement (doi:10.3390/v14102306), 2022-10-20
Supplement: s1 [file s1]

Table S1. The specific primers used for RT-PCR and genome sequencing.

| Primer     | Sequence                                                                           |
|------------|------------------------------------------------------------------------------------|
| CA16-679F  | GGATACRTCCCTCTYAATYWCAAG                                                           |
| CA16-1312F | GCTTTRCTRGRGCGYGTG                                                                 |
| CA16-2054F | CATTRGARGTRACRTTYATG                                                               |
| CA16-2092F | GCYACAGGYAAGATGCTYATYG                                                             |
| CA16-3201F | GGATTAAACACGTCAGAGCATGG                                                            |
| CA16-3384R | CTACYCTRTARTTGCCBACATATATGGC                                                       |
| CA16-3821F | GGTATGGGTTTCACTGATGC                                                               |
| CA16-4414F | GCAGTTCAAGAGCAAACAC                                                                |
| CA16-5272F | GCAGTTGTGTCYCTTGTCTATG                                                             |
| CA16-5294F | GTTATTTACAAATTGTTGCGCYGG                                                           |
| CA16-5444R | GCACCTGTCTAATGTTACGCC                                                              |
| CA16-5922F | CTTYGCCAGTGAACARGGAG                                                               |
| CA16-6017F | CCCAGTGYATTCTATGATG                                                                |
| CA16-6722F | GCTGTGTCACTAATAGAAGGG                                                              |
| CA16-6804R | CCTGAGGGCATTCCACCAAG                                                               |
| CA16-7401R | GGTTATAACAAATTTACCCCCACC                                                           |
| 4643F      | GTAGAATTCTAGCTAATACGACTCACTATAGTTAAAACAGCCTGTGGGTTG                                |
| 4643R-T50  | CCTACGGCCGTTTTTTTTTT TTTTTTTTTTTTTTTTTTTTTTTTTTTTTTTTTTTTGGCTATTCTGGTTATAAC AATTAC |
| 051        | TSAARYTGTGCAARGACAC                                                                |
| 011        | GCICIGAYTGITGICCRAA                                                                |

Table S2. The reference strains obtained from Genbank used in phylogenetic analysis and BootScan analysis

| Isolate                | Year of isolation | Country      | Accession Number |
|------------------------|-------------------|--------------|------------------|
| S70382*                | 1998              | Malaysia     | AM292461         |
| UM12969*               | 1999              | Malaysia     | AM292479         |
| SB1660*                | 2000              | Malaysia     | AM292465         |
| SB16087*               | 2005              | Malaysia     | AM292528         |
| Shzh99-48*             | 1999              | China        | AY895116         |
| Shzh99-83*             | 1999              | China        | AY821797         |
| Shzh00-2*              | 2000              | China        | AY895127         |
| Shzh01-69*             | 2001              | China        | AY895111         |
| Shzh02-78*             | 2002              | China        | AY895108         |
| Shzh03-10*             | 2003              | China        | AY895095         |
| Shzh04-J31*            | 2004              | China        | AY821796         |
| Shzh/05-66*            | 2005              | China        | HM776224         |
| Shzh/07-16*            | 2007              | China        | HM776248         |
| SZ/HK08-3*             | 2008              | China        | GQ279368         |
| Shzh/09-2-5*           | 2009              | China        | HM776277         |
| 0033*                  | 2005              | Australia    | AM292435         |
| TS1-2000*              | 2000              | Thailand     | AM292477         |
| 5338*                  | 2003              | Saudi Arabia | AM292443         |
| 1018T*                 | 2005              | Vietnam      | AM292441         |
| 379/Toyama*            | 1984              | Japan        | AB465367         |
| 188/Toyama*            | 2000              | Japan        | AB465372         |
| 260/Toyama*            | 2002              | Japan        | AB465389         |
| 355/Toyama*            | 2005              | Japan        | AB465401         |
| 418/Toyama*            | 2006              | Japan        | AB465402         |
| 459/Toyama*            | 2007              | Japan        | AB465404         |
| CA16/G-10*†            | 1951              | South Africa | U05876           |
| CA4/High Point†        | 1948              | USA          | AY421762         |
| EV71/BrCr (A)†         | 1970              | USA          | U22521           |
| EV71/237-TW86 (B1)†    | 1986              | Taiwan       | FJ357380         |
| EV71/MS/7423/87 (B2)†  | 1987              | USA          | U22522           |
| EV71/SAR/SHA66 (B3)†   | 1997              | Malaysia     | AM396586         |
| EV71/S0318-TW01 (B4)†  | 2001              | Taiwan       | FJ357376         |
| EV71/M0380-TW08 (B5)†  | 2008              | Taiwan       | FJ357385         |
| EV71/804/NO/03 (C1)†   | 2003              | Norway       | DQ452074         |
| EV71/ N4643-TW98 (C2)† | 1998              | Taiwan       | AF304458         |
| EV71/06-KOR-00 (C3)†   | 2000              | South Korea  | DQ341355         |
| EV71/GZ-08-02 (C4)†    | 2008              | China        | FJ360545         |
| EV71/E2005125-TW (C5)† | 2006              | Taiwan       | EF063152         |

\* Sequences analyzed in phylogenetic analysis.

† Sequences analyzed in Bootscan analysis.

() The corresponding EV71 genotypes are described in the brackets

Table S3. Non-structural protein amino acid sequences specific for CV-A16 in Taiwan.

| Virus genotype<br>and isolates | 2A <sup>a</sup> |    |     |     | 2B |   |    |    |    |    |    | 2C |     |     |     |     |     |     | 3A  |    |
|--------------------------------|-----------------|----|-----|-----|----|---|----|----|----|----|----|----|-----|-----|-----|-----|-----|-----|-----|----|
|                                | 82 <sup>b</sup> | 85 | 102 | 123 | 3  | 6 | 15 | 57 | 85 | 95 | 96 | 23 | 102 | 103 | 228 | 243 | 280 | 303 | 311 | 39 |
| <b>Subgenotype B1</b>          |                 |    |     |     |    |   |    |    |    |    |    |    |     |     |     |     |     |     |     |    |
| H0041TW98 <sup>c</sup>         | I               | E  | V   | I   | S  | I | V  | V  | A  | I  | V  | S  | Y   | A   | V   | Y   | R   | I   | I   | E  |
| N1764TW99                      | I               | E  | V   | I   | S  | I | M  | V  | A  | I  | V  | S  | Y   | A   | V   | Y   | R   | I   | I   | E  |
| N2367TW00                      | I               | E  | V   | I   | S  | I | M  | V  | A  | I  | V  | S  | Y   | A   | V   | Y   | R   | I   | I   | E  |
| N1771TW01 <sup>d</sup>         | I               | E  | V   | I   | S  | I | M  | V  | A  | I  | V  | S  | Y   | A   | V   | Y   | R   | I   | I   | E  |
| N1660TW03                      | I               | E  | V   | I   | S  | I | M  | V  | A  | I  | V  | S  | Y   | A   | V   | Y   | R   | I   | I   | E  |
| N0584TW04                      | I               | E  | V   | I   | S  | I | M  | V  | A  | I  | V  | S  | Y   | A   | V   | Y   | R   | I   | I   | E  |
| N2208TW05 <sup>e</sup>         | I               | E  | V   | I   | S  | I | M  | V  | A  | I  | V  | S  | Y   | A   | V   | Y   | R   | I   | I   | E  |
| N2910TW07                      | I               | E  | V   | I   | S  | I | M  | V  | A  | I  | V  | S  | Y   | A   | V   | Y   | R   | I   | I   | E  |
| N0640TW08                      | I               | E  | V   | I   | S  | I | M  | V  | A  | I  | V  | S  | Y   | A   | V   | Y   | R   | I   | I   | E  |
| M0645TW09 <sup>f</sup>         | I               | E  | V   | I   | S  | I | M  | V  | A  | I  | V  | S  | Y   | A   | V   | Y   | R   | I   | I   | E  |
| M0317TW10                      | I               | E  | V   | I   | S  | I | M  | V  | A  | I  | V  | S  | Y   | A   | V   | Y   | R   | I   | I   | E  |
| M0664TW10 <sup>g</sup>         | I               | E  | V   | I   | S  | I | M  | V  | A  | I  | V  | S  | Y   | A   | V   | Y   | R   | I   | I   | E  |
| M1401TW11 <sup>h</sup>         | I               | E  | V   | I   | S  | I | M  | V  | A  | I  | V  | S  | Y   | A   | V   | Y   | R   | I   | I   | E  |
| M1651TW12                      | I               | E  | V   | I   | S  | I | M  | V  | A  | I  | V  | S  | Y   | A   | V   | Y   | R   | I   | I   | E  |
| M1165TW13                      | I               | E  | V   | I   | S  | I | M  | V  | A  | I  | V  | S  | Y   | A   | V   | Y   | R   | I   | I   | E  |
| M0888TW14                      | I               | E  | V   | I   | S  | I | M  | V  | A  | I  | V  | S  | Y   | A   | V   | Y   | R   | I   | I   | E  |
| M0589TW15                      | I               | E  | V   | I   | S  | I | M  | V  | A  | I  | V  | S  | Y   | A   | V   | Y   | R   | I   | I   | D  |
| M0657TW16                      | I               | E  | V   | I   | S  | I | M  | V  | A  | I  | V  | S  | Y   | A   | V   | Y   | R   | I   | I   | E  |
| <b>Subgenotype B2</b>          |                 |    |     |     |    |   |    |    |    |    |    |    |     |     |     |     |     |     |     |    |
| N1370TW00 <sup>i</sup>         | V               | D  | Q   | L   | T  | V | I  | I  | S  | M  | A  | N  | F   | T   | I   | F   | K   | V   | V   | D  |
| N3649TW00                      | V               | D  | Q   | L   | T  | V | I  | I  | S  | M  | A  | N  | F   | T   | I   | F   | K   | V   | V   | D  |

a: CA16 viral protein coding region.

b: The numbers represents the amino acid position in the viral protein.

c: The same sequence was also identified in 5079TW98.

d: The same sequence was also identified in N1508TW02, and N1679TW02.

e: The same sequence was also identified in N3276TW06.

f: The same sequence was also identified in N2736TW09.

g: The same sequence was also identified in M0357TW10, M0632TW10, M0702TW10, M0877TW10, M0964TW10, and M1136TW10.

h: The same sequence was also identified in N12878TW11.

i: The same sequence was also identified in S0969TW99.

Table S3. Non-structural protein amino acid sequences specific for CV-A16 in Taiwan (continued).

| Virus genotype<br>and isolates | 3C |    |     | 3D |    |    |    |    |    |     |     |     |     |     |     |     |     |     |     |     |     |     |
|--------------------------------|----|----|-----|----|----|----|----|----|----|-----|-----|-----|-----|-----|-----|-----|-----|-----|-----|-----|-----|-----|
|                                | 93 | 95 | 177 | 37 | 66 | 68 | 75 | 89 | 91 | 106 | 125 | 134 | 138 | 139 | 168 | 197 | 251 | 255 | 279 | 342 | 396 | 428 |
| <b>Subgenotype B1</b>          |    |    |     |    |    |    |    |    |    |     |     |     |     |     |     |     |     |     |     |     |     |     |
| H0041TW98                      | T  | T  | G   | N  | T  | H  | T  | D  | N  | Y   | V   | I   | T   | T   | I   | T   | V   | E   | K   | S   | R   | E   |
| N1764TW99                      | T  | T  | G   | N  | T  | H  | T  | D  | N  | Y   | V   | I   | T   | T   | I   | T   | V   | E   | R   | S   | R   | E   |
| N2367TW00                      | T  | T  | G   | N  | T  | H  | T  | D  | N  | Y   | V   | I   | T   | T   | I   | T   | V   | E   | K   | S   | R   | E   |
| N1771TW01                      | T  | T  | G   | N  | T  | H  | T  | D  | N  | H   | V   | I   | T   | T   | I   | T   | V   | E   | K   | S   | R   | E   |
| N1660TW03                      | T  | T  | G   | N  | T  | H  | T  | D  | N  | Y   | V   | I   | T   | A   | I   | T   | V   | E   | K   | S   | R   | E   |
| N0584TW04                      | T  | T  | G   | N  | T  | H  | T  | D  | N  | Y   | I   | T   | T   | T   | I   | T   | V   | E   | K   | S   | R   | E   |
| N2208TW05                      | T  | T  | G   | S  | T  | H  | T  | D  | N  | Y   | V   | I   | T   | T   | I   | T   | V   | E   | K   | S   | R   | E   |
| N2910TW07                      | T  | T  | S   | S  | T  | H  | T  | D  | N  | Y   | I   | I   | T   | T   | I   | T   | V   | E   | K   | S   | R   | E   |
| N0640TW08                      | T  | T  | S   | S  | T  | H  | T  | D  | N  | Y   | V   | I   | T   | T   | I   | T   | V   | E   | K   | S   | R   | E   |
| M0645TW09                      | T  | T  | S   | S  | T  | H  | T  | D  | N  | Y   | V   | I   | T   | T   | I   | T   | V   | E   | K   | S   | R   | E   |
| M0317TW10                      | T  | T  | S   | S  | T  | H  | T  | D  | N  | Y   | V   | V   | T   | T   | I   | T   | M   | E   | K   | S   | R   | E   |
| M0664TW10                      | T  | T  | S   | S  | T  | H  | T  | D  | N  | Y   | V   | T   | T   | T   | I   | T   | V   | E   | K   | S   | R   | E   |
| M1401TW11                      | T  | T  | S   | I  | T  | H  | T  | D  | N  | Y   | V   | I   | T   | T   | I   | T   | L   | E   | K   | S   | R   | E   |
| M1651TW12                      | T  | T  | G   | S  | T  | H  | M  | D  | N  | Y   | I   | V   | T   | T   | I   | T   | V   | E   | K   | S   | R   | E   |
| M1165TW13                      | T  | T  | G   | S  | T  | H  | T  | D  | N  | Y   | I   | V   | T   | T   | I   | T   | V   | E   | K   | S   | R   | E   |
| M0888TW14                      | T  | T  | G   | S  | T  | H  | M  | D  | N  | Y   | I   | V   | T   | T   | I   | T   | V   | E   | K   | S   | R   | E   |
| M0589TW15                      | T  | T  | S   | N  | T  | H  | T  | D  | N  | Y   | V   | I   | T   | T   | I   | T   | V   | E   | K   | S   | K   | E   |
| M0657TW16                      | T  | T  | G   | S  | T  | H  | T  | D  | N  | Y   | I   | V   | T   | T   | I   | T   | V   | E   | K   | S   | R   | E   |
| <b>Subgenotype B2</b>          |    |    |     |    |    |    |    |    |    |     |     |     |     |     |     |     |     |     |     |     |     |     |
| N1370TW00                      | D  | S  | S   | D  | V  | Y  | Q  | S  | D  | N   | I   | T   | V   | S   | V   | V   | M   | D   | R   | L   | K   | D   |
| N3649TW00                      | D  | S  | S   | D  | V  | Y  | Q  | S  | N  | N   | I   | T   | V   | S   | V   | V   | M   | D   | R   | L   | K   | D   |

Table S4. Summary of the number of codons identified by Single-likelihood ancestor counting (SLAC) and fixed effects likelihood (FEL) methods.

| Number of sites     | SLAC ( $p<0.1$ ) | FEL ( $p<0.1$ ) |
|---------------------|------------------|-----------------|
| Positively selected | 1                | 1               |
| Negatively selected | 82               | 137             |

Table S5. Total CV-A16 isolation Accession Numbers.

| Isolate     | Year of Isolation | Accession Number       |
|-------------|-------------------|------------------------|
| N4195TW00   | 2000              | OP562202 (VP1)         |
| S0889TW99   | 1999              | OP562203 (VP1)         |
| N1923TW00   | 2000              | OP562204 (VP1)         |
| N3771TW00   | 2000              | OP562205 (VP1)         |
| N5212TW98   | 1998              | OP562206 (VP1)         |
| N5944TW98   | 1998              | OP562207 (VP1)         |
| N2338TW01   | 2001              | OP562208 (VP1)         |
| N3377TW01   | 2001              | OP562209 (VP1)         |
| N3927TW01   | 2001              | OP562210 (VP1)         |
| N4461TW01   | 2001              | OP562211 (VP1)         |
| N0971TW02   | 2002              | OP562212 (VP1)         |
| N3230TW02   | 2002              | OP562213 (VP1)         |
| N4097TW02   | 2002              | OP562214 (VP1)         |
| N0212TW03   | 2003              | OP562215 (VP1)         |
| N2755TW03   | 2003              | OP562216 (VP1)         |
| N1226TW03   | 2003              | OP562217 (VP1)         |
| N1377TW03   | 2003              | OP562218 (VP1)         |
| N2557TW07   | 2007              | OP562219 (VP1)         |
| N2296TW05   | 2005              | OP562220 (VP1)         |
| N3585TW05   | 2005              | OP562221 (VP1)         |
| N1327TW05   | 2005              | OP562222 (VP1)         |
| N2209TW05   | 2005              | OP562223 (VP1)         |
| M738TW10    | 2010              | OP562224 (VP1)         |
| M965TW10    | 2010              | OP562225 (VP1)         |
| M1358TW10   | 2010              | OP562226 (VP1)         |
| N3050TW07   | 2007              | OP562227 (VP1)         |
| M1551TW12   | 2012              | OP562228 (VP1-VP4)     |
| M0934TW13   | 2013              | OP562229 (VP1-VP4)     |
| M0998TW14   | 2014              | OP562230 (VP1-VP4)     |
| M0578TW15   | 2015              | OP562231 (VP1-VP4)     |
| M1005TW16   | 2016              | OP562232 (VP1-VP4)     |
| M50867TW18  | 2018              | OP562233 (VP1-VP4)     |
| M50922TW18  | 2018              | OP562234 (VP1-VP4)     |
| M50066TW19  | 2019              | OP562235 (VP1-VP4)     |
| X024848TW17 | 2017              | OP562236 (VP1-VP4)     |
| M50944TW19  | 2019              | OP562237 (VP1-VP4)     |
| 5079TW98    | 1998              | AF177911 (Full Length) |
| S0969TW99   | 1999              | OP562188 (Full Length) |

---

|            |      |                        |
|------------|------|------------------------|
| N1370TW00  | 2000 | OP562189 (Full Length) |
| N3649TW00  | 2000 | OP562190 (Full Length) |
| H0041TW98  | 1998 | OP562170 (Full Length) |
| N1764TW99  | 1999 | OP562171 (Full Length) |
| N2367TW00  | 2000 | OP562172 (Full Length) |
| N1771TW01  | 2001 | OP562173 (Full Length) |
| N1508TW02  | 2002 | OP562174 (Full Length) |
| N1679TW02  | 2002 | OP562175 (Full Length) |
| N1660TW03  | 2003 | OP562176 (Full Length) |
| N0584TW04  | 2004 | OP562177 (Full Length) |
| N3276TW06  | 2006 | OP562179 (Full Length) |
| N2208TW05  | 2005 | OP562178 (Full Length) |
| M0645TW09  | 2009 | OP562182 (Full Length) |
| N2736TW09  | 2009 | OP562191 (Full Length) |
| M0357TW10  | 2010 | OP562193 (Full Length) |
| M0664TW10  | 2010 | OP562184 (Full Length) |
| M0702TW10  | 2010 | OP562194 (Full Length) |
| M0877TW10  | 2010 | OP562195 (Full Length) |
| M0964TW10  | 2010 | OP562185 (Full Length) |
| M1136TW10  | 2010 | OP562196 (Full Length) |
| N2910TW07  | 2007 | OP562180 (Full Length) |
| N0640TW08  | 2008 | OP562181 (Full Length) |
| M1401TW11  | 2011 | OP562186 (Full Length) |
| N12878TW11 | 2011 | OP562187 (Full Length) |
| M0317TW10  | 2010 | OP562183 (Full Length) |
| M0632TW10  | 2010 | OP562192 (Full Length) |
| M1651TW12  | 2012 | OP562197 (Full Length) |
| M1165TW13  | 2013 | OP562198 (Full Length) |
| M0888TW14  | 2014 | OP562199 (Full Length) |
| M0589TW15  | 2015 | OP562200 (Full Length) |
| M0657TW16  | 2016 | OP562201 (Full Length) |

---
